# Supplementary material
Source: PubMed Central journal article supplement (PMC4608680)
Supplement: NIHMS727836-supplement-Supplemental_material.pdf [file NIHMS727836-supplement-Supplemental_material.pdf]

## Supporting Information for

### Profiling and imaging analysis of cholesterol and 7-dehydrocholesterol in cells via sputtered silver nanoparticle MALDI-ion mobility-MS

Libin Xu,<sup>1,2,#</sup> Michal Kliman,<sup>1,2,3#</sup> Jay Forsythe,<sup>1,2,3</sup> Zeljka Korade,<sup>4</sup> Anthony B. Hmelo,<sup>5</sup> Ned A. Porter,<sup>1,2</sup> John A. McLean<sup>1,2,3\*</sup>

<sup>1</sup>Department of Chemistry, <sup>2</sup>Vanderbilt Institute of Chemical Biology, <sup>3</sup>Vanderbilt Institute for Integrative Biosystems Research and Education, <sup>4</sup>Department of Psychiatry and Vanderbilt Kennedy Center for Research on Human Development, <sup>5</sup>Vanderbilt Institute for Nanoscale Science and Engineering, Vanderbilt University, Nashville, Tennessee 37235

#### Abstract

Profiling and imaging of cholesterol and its precursors by mass spectrometry (MS) are important in a number of cholesterol biosynthesis disorders, such as in Smith-Lemli-Opitz syndrome (SLOS), where 7-dehydrocholesterol (7-DHC) is accumulated in affected individuals. SLOS is caused by defects in the enzyme that reduces 7-DHC to cholesterol. However, analysis of sterols is challenging because these hydrophobic olefins are difficult to ionize for MS detection. We report here sputtered silver MALDI – ion mobility – MS (IM-MS) analysis of cholesterol and 7-DHC. In comparison with liquid-based AgNO<sub>3</sub> and colloidal Ag nanoparticle (AgNP), sputtered silver NP (10 – 25 nm) provided the lowest limits-of-detection based on the silver coordinated [cholesterol+Ag]<sup>+</sup> and [7-DHC+Ag]<sup>+</sup> signals while minimizing dehydrogenation products ([M+Ag-2H]<sup>+</sup>). When analyzing human fibroblasts that were directly grown on poly-L-lysine-coated ITO glass plates with this technique, *in situ*, the 7-DHC/cholesterol ratios for both control and SLOS human fibroblasts are readily obtained. The *m/z* of 491 (specific for [7-DHC+<sup>107</sup>Ag]<sup>+</sup>) and 495 (specific for [cholesterol+<sup>109</sup>Ag]<sup>+</sup>) were subsequently imaged using MALDI-IM-MS. MS images were co-registered with optical images of the cells for metabolic ratio determination. From these comparisons, ratios of 7-DHC/cholesterol for SLOS human fibroblasts are distinctly higher than in control human fibroblasts. Thus, this strategy demonstrates the utility for diagnosing/assaying the severity of cholesterol biosynthesis disorders *in vitro*.

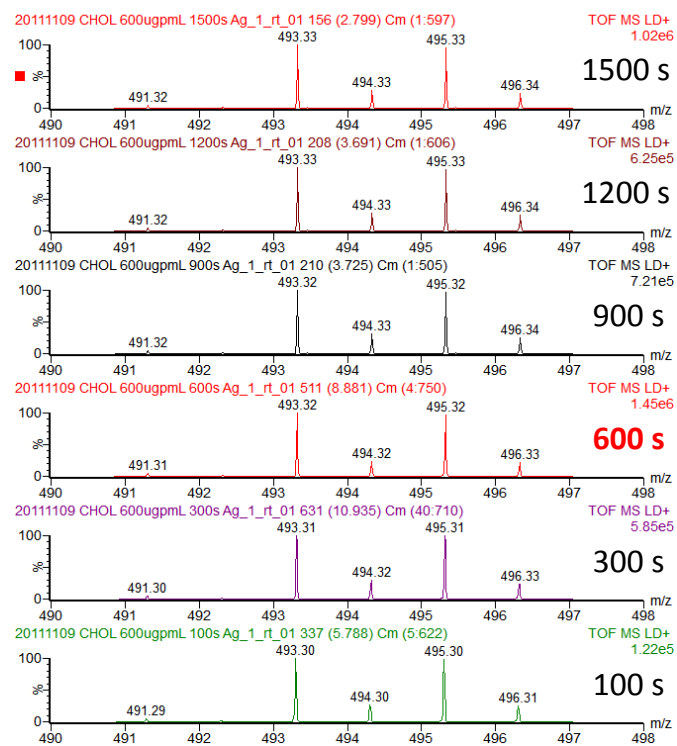

**Figure S1.** Optimization of sputtering time for cholesterol standard. Triplicate experiments were performed for each sputtering time condition for 0.78 nmol cholesterol standard.

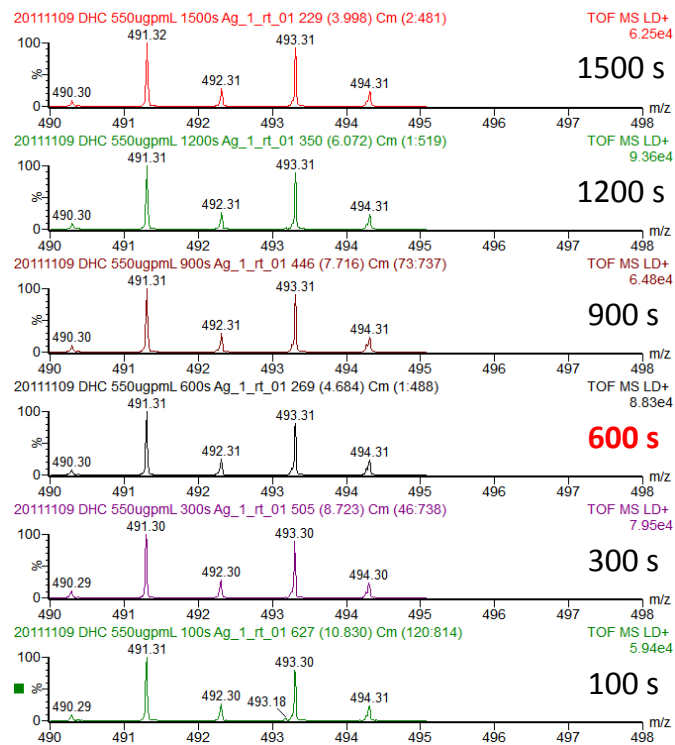

**Figure S2.** Optimization of sputtering time for 7-dehydrocholesterol (7-DHC) standard. Triplicate experiments were performed for each sputtering time condition for 0.72 nmol 7-DHC standard.

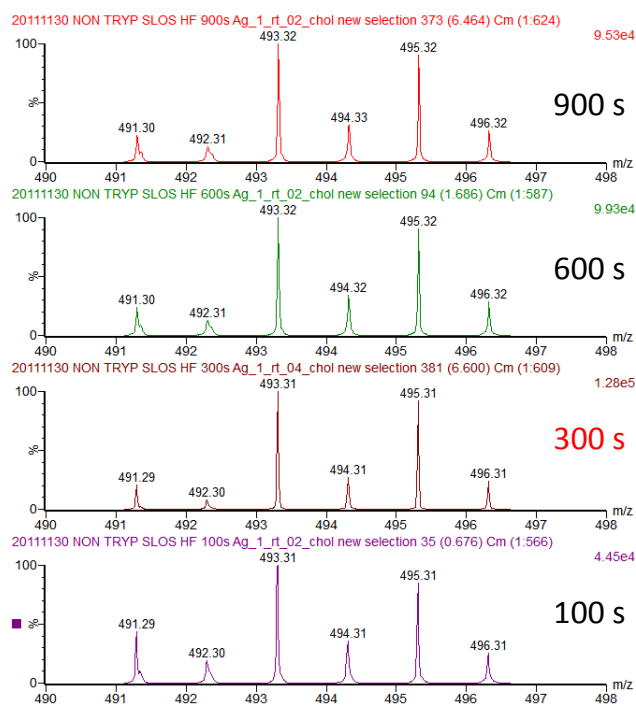

**Figure S3.** Optimization of sputtering time on cells using non-trypsinized SLOS human fibroblasts that were grown on poly-L-lysine and ITO-coated glass MALDI plates. Triplicate experiments were carried out for each condition. 300 s of sputtering was found to give the highest signal intensity, but 100 s was found to give the highest 7-DHC/Cholesterol ratio, suggesting less dehydrogenation peaks were formed from  $[7\text{-DHC}+\text{Ag}]^+$ .

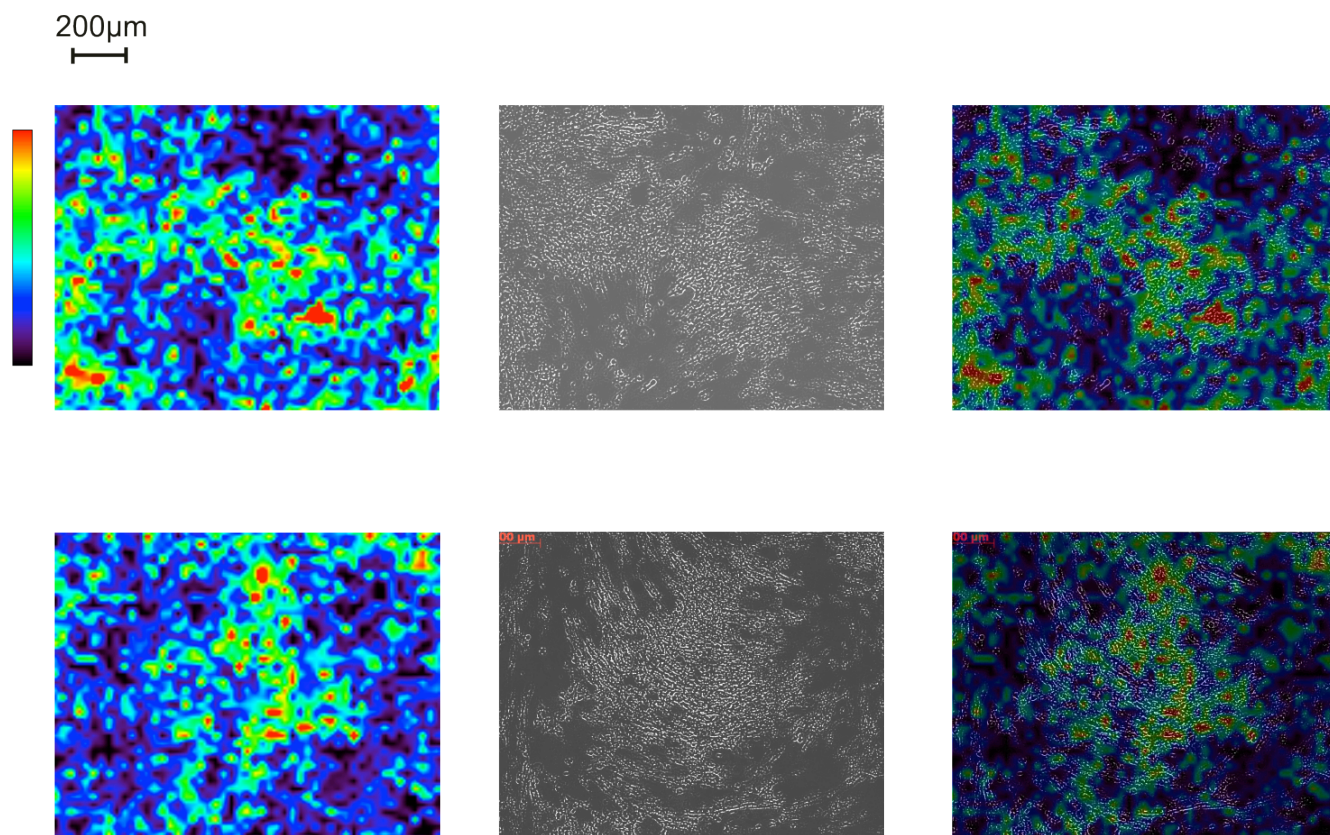

**Figure S4.** Overlay (right) of MS images (left,  $m/z$  495) and optical images (center) of the control fibroblast cells in the same regions of ITO-coated glass plates where cells were grown.

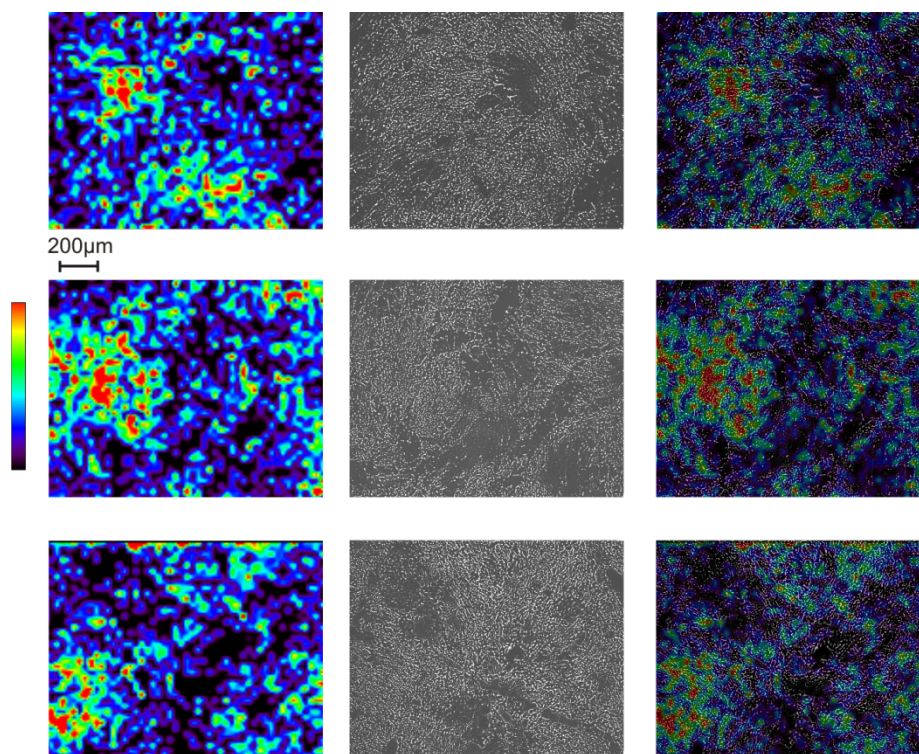

**Figure S5.** Overlay (right) of MS images (left,  $m/z$  495) and optical images (center) of the SLOS fibroblast cells in the same regions of ITO-coated glass plates where cells were grown.

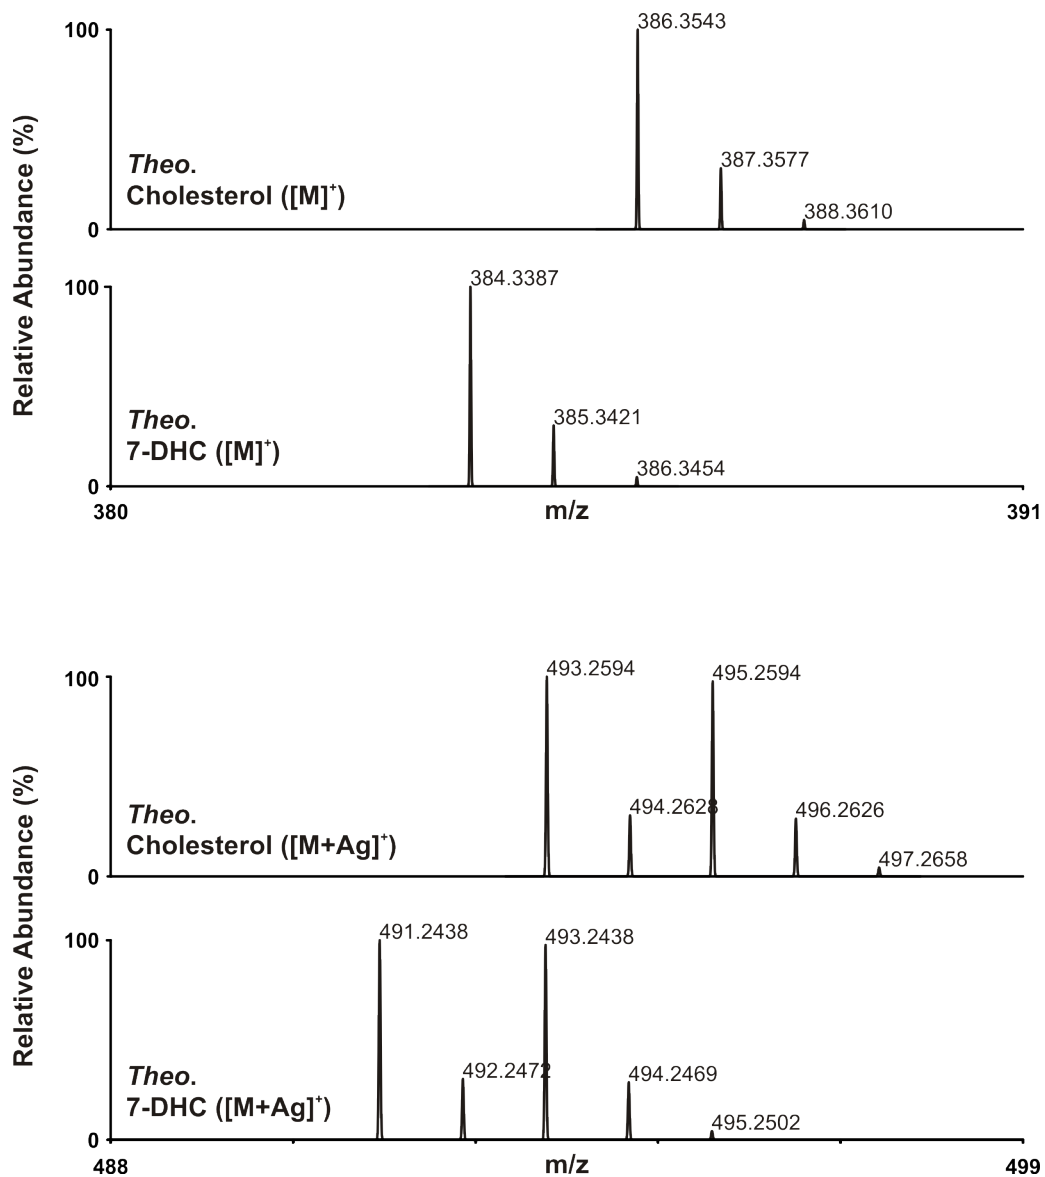

**Figure S6.** Theoretical isotope distributions for cholesterol and 7-DHC (top) and their respective silver-coordinated species (bottom).
